# Supplementary material for: Potential Dual Role of Eugenol in Inhibiting Advanced Glycation End Products in Diabetes: Proteomic and Mechanistic Insights
Source: PubMed Central journal article supplement (PMC4704049; doi:10.1038/srep18798), 2016-01-07
Supplement: srep18798-s1.pdf [file srep18798-s1.pdf]

## **SUPPORTING INFORMATION**

### **Potential Dual Role of Eugenol in Inhibiting Advanced Glycation End Products in Diabetes: Proteomic and Mechanistic Insights**

Priyanka Singh<sup>1,2</sup>, Ramesha H. Jayaramaiah<sup>1</sup>, Sachin B. Agawane<sup>1</sup>, Garikapati Vannuruswamy<sup>1</sup>, Arvind M. Korwar<sup>1</sup>, Atul Anand<sup>1,2</sup>, Vitthal S. Dhaygude<sup>3</sup>, Mahemud L. Shaikh<sup>4</sup>, Rakesh S. Joshi<sup>5</sup>, Ramanamurthy Boppana<sup>4</sup>, Mahesh J. Kulkarni<sup>1</sup>, Hirekodathakallu V. Thulasiram<sup>2,6</sup>, Ashok P. Giri<sup>1,\*</sup>

| <b><u>Table of contents:</u></b> | <b>Page No.</b> |
|----------------------------------|-----------------|
| Supplementary Figure S1.....     | S2              |
| Supplementary Figure S2.....     | S3              |
| Supplementary Figure S3.....     | S4-S5           |
| Supplementary Table S1.....      | S6              |
| Supplementary Table S2.....      | S7              |
| Supplementary Table S3.....      | S8              |
| Supplementary Table S4.....      | S8              |

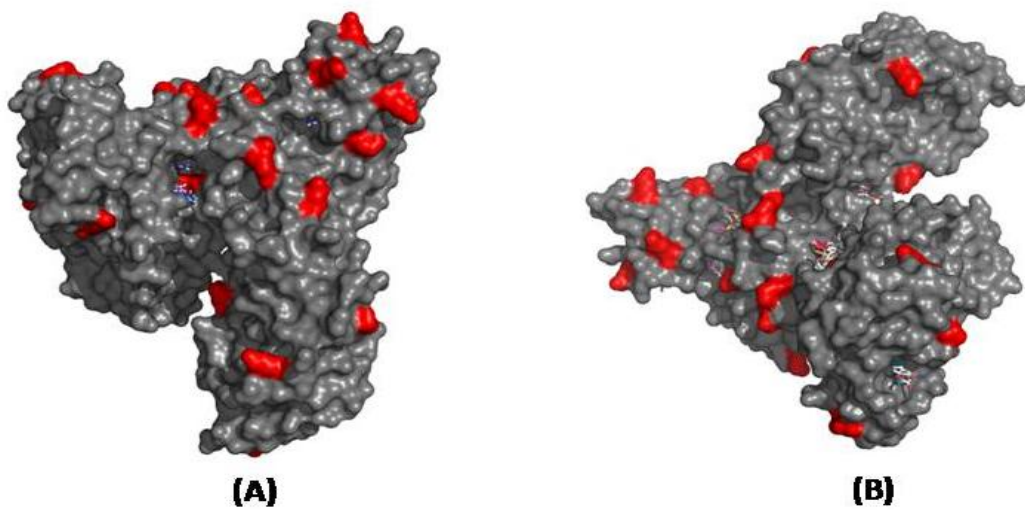

**Supplementary Figure S1:** Glycation modifications depicting surface exposed lysine residues (A) glycated BSA with aminoguanidine hydrochloride (B) glycated BSA with eugenol methyl ether

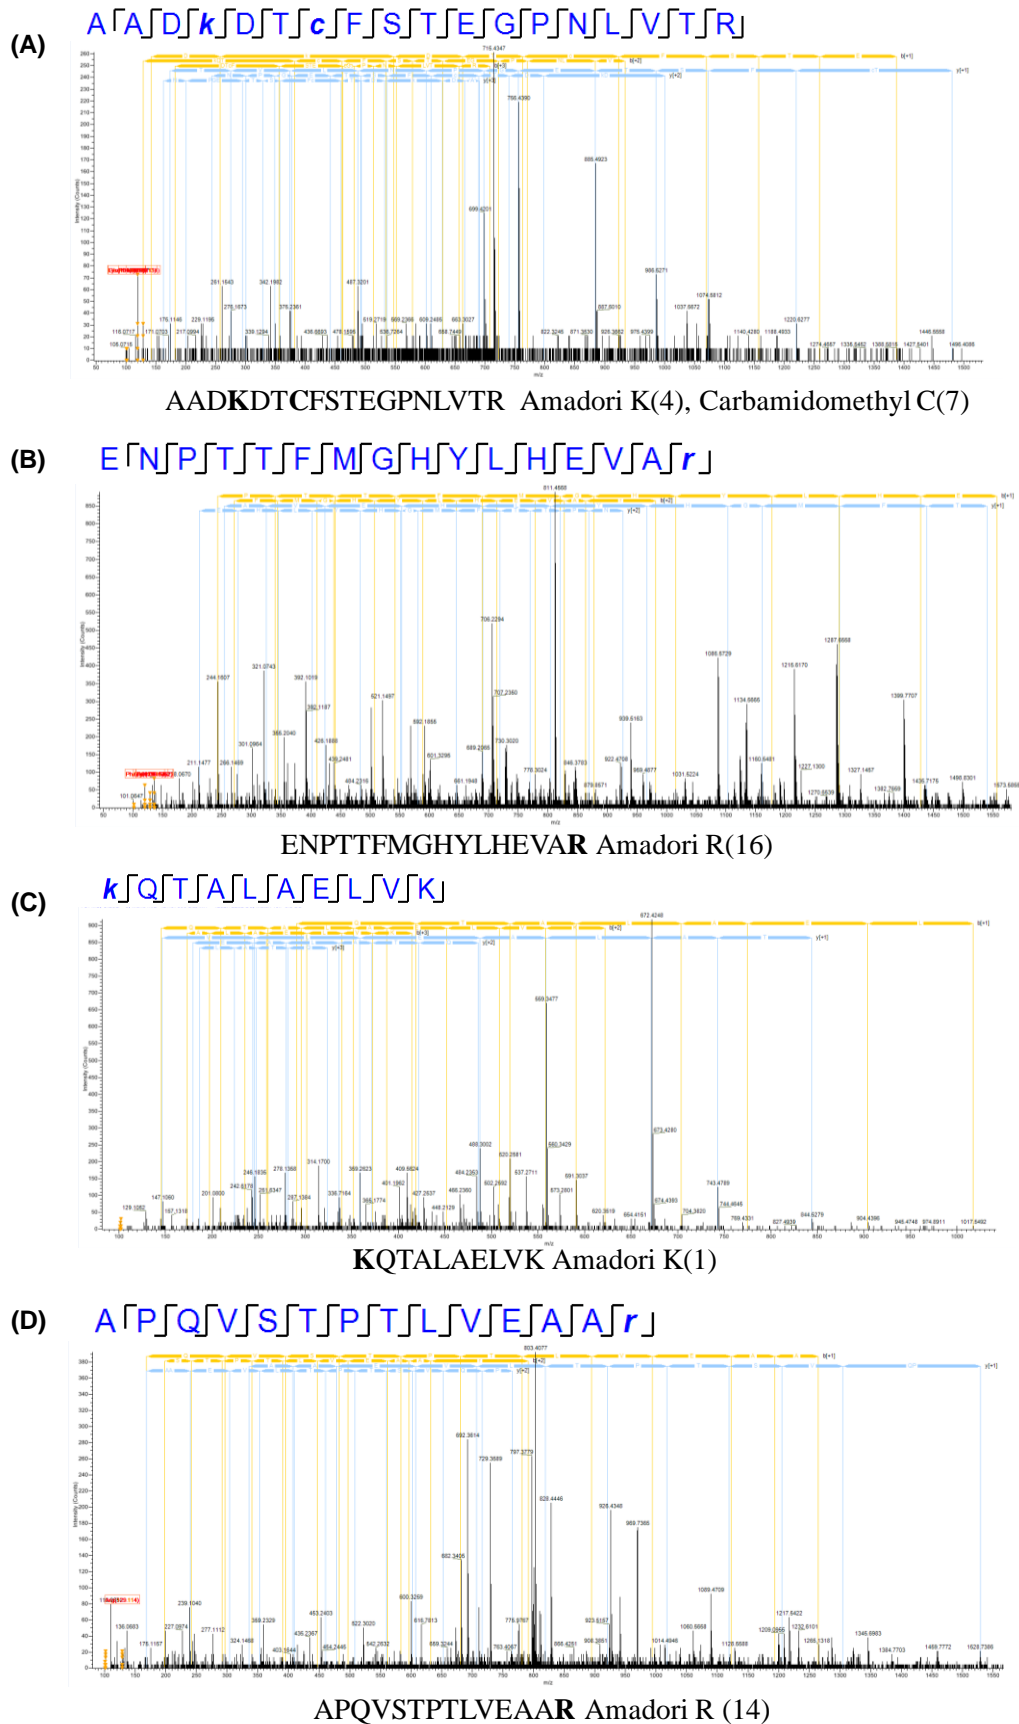

**Supplementary figure S2:** MS/MS spectra annotation of AGE modified peptides of MSA at (A) K588 (B) R168 (C) K549 (D) R452; K, Lysine; R, Arginine.

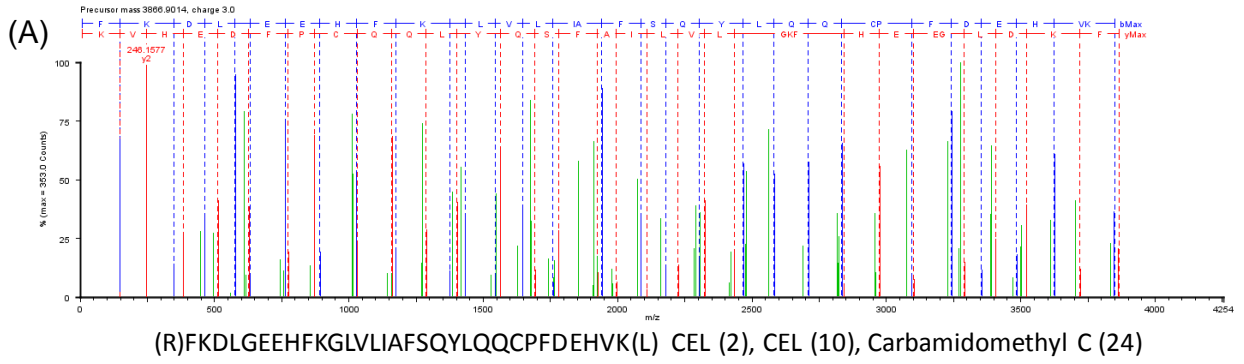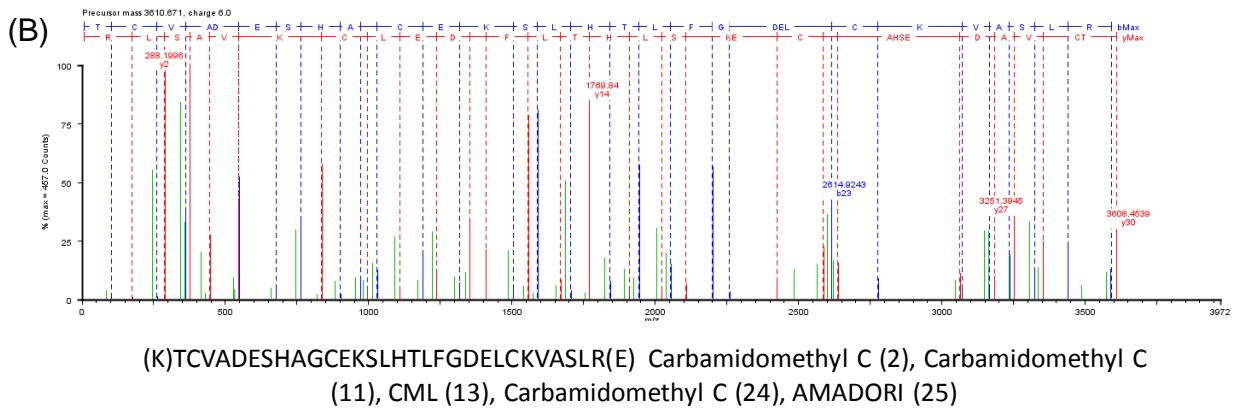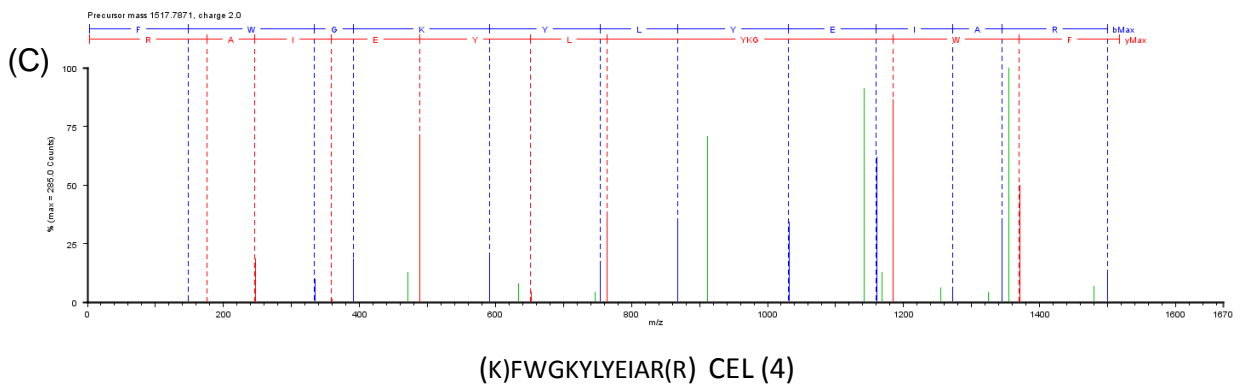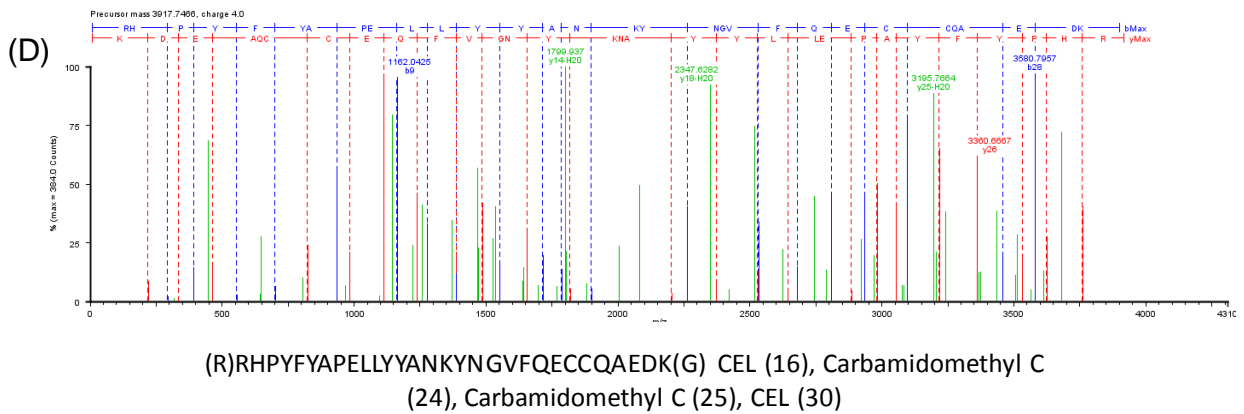

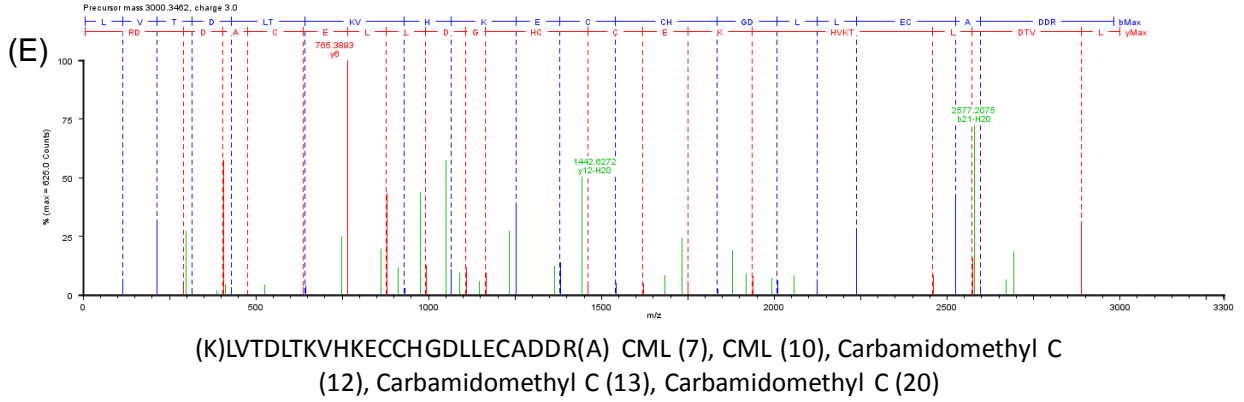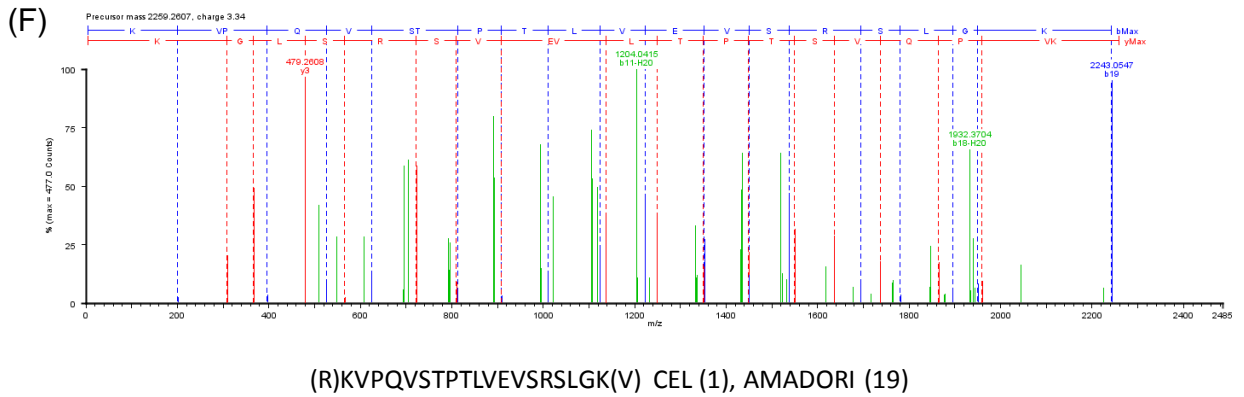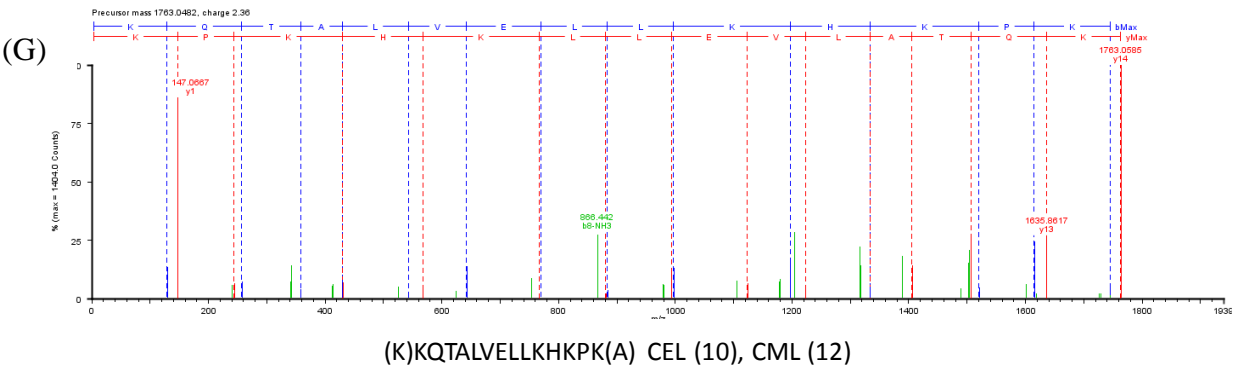

**Supplementary Figure S3:** MS/MS spectra annotation of AGE modified peptides of BSA at (A) K36 (B) K88 (C) K160 (D) K184 (E) K263 (F) K438 (G) K548

**Supplementary Table S1:** GC-MS-based chemical profiling of leaf tissue of *Ocimum kilimandscharicum*, *Ocimum tenuiflorum* and *Ocimum gratissimum*

| Compound name         | <i>O. kilimandscharicum</i> | <i>O. tenuiflorum</i> | <i>O. gratissimum</i> |
|-----------------------|-----------------------------|-----------------------|-----------------------|
| <b>Monoterpenes</b>   |                             |                       |                       |
| Pinene                | 0.92 ± 0.2                  | ND                    | ND                    |
| β- Ocimene            | ND                          | ND                    | 4.94 ± 0.3            |
| Borneal               | 0.74 ± 0.003                | ND                    | ND                    |
| Borneol               | ND                          | 1.2 ± 0.06            | ND                    |
| Camphene              | 3.59 ± 0.01                 | ND                    | ND                    |
| Camphor               | <b>47.33 ± 0.3</b>          | ND                    | ND                    |
| Eucalyptol            | 19.85 ± 0.16                | ND                    | ND                    |
| Limonene              | 4.97 ± 0.01                 | ND                    | ND                    |
| Myrtenol              | 0.99 ± 0.15                 | ND                    | ND                    |
| Terpineal             | 0.28 ± 0.002                | ND                    | ND                    |
| Terpineol             | 0.25 ± 0.03                 | ND                    | ND                    |
| Terpinolene           | 0.41 ± 0.01                 | ND                    | ND                    |
| Thujanol              | 2.78 ± 0.01                 | ND                    | 0.5                   |
| Cis-thujene           | ND                          | ND                    | 0.24                  |
| <b>Sesquiterpenes</b> |                             |                       |                       |
| α- Caryophyllene      | 0.45 ± 0.02                 | ND                    | ND                    |
| α- Copaene            | 0.56 ± 0.01                 | 3.33 ± 0.12           | 1.54                  |
| α- Humulene           | ND                          | 0.88 ± 0.04           | ND                    |
| β- Bourbonene         | ND                          | 1 ± 0.05              | 0.39                  |
| β- Caryophyllene      | 3.68 ± 0.02                 | 14.5 ± 0.09           | 2.87 ± 0.03           |
| β- Cubebene           | 0.39 ± 0.004                | 2.33 ± 0.01           | 0.66 ± 0.05           |
| β- Elemene            | 0.25 ± 0.002                | 0.89 ± 0.06           | 0.36 ± 0.05           |
| δ- Cadinene           | 0.18 ± 0.01                 | 3.11 ± 0.15           | 0.36 ± 0.001          |
| Elemol                | ND                          | 1.72 ± 0.08           | ND                    |
| Farnesene             | 0.69 ± 0.23                 | ND                    | ND                    |
| Germacrene D          | 5.19 ± 0.05                 | 5.83 ± 0.35           | 9.52 ± 0.15           |
| Germacrene-D-al       | 0.09 ± 0.01                 | ND                    | 0.21                  |
| Murrolene             | ND                          | ND                    | 0.10 ± 0.01           |
| <b>Others</b>         |                             |                       |                       |
| Eugenol               | ND                          | ND                    | <b>78.25 ± 0.4</b>    |
| Eugenol Methyl Ether  | ND                          | <b>60.41 ± 0.75</b>   | ND                    |
| Dodecane              | 0.19 ± 0.002                | 0.37 ± 0.02           | ND                    |
| Dodecene              | 0.18 ± 0.002                | 0.43 ± 0.01           | ND                    |
| Heptene               | 0.33 ± 0.02                 | ND                    | ND                    |
| Octane derivative     | 0.10 ± 0.03                 | 0.46 ± 0.12           | ND                    |
| Tetradecane           | ND                          | 0.23 ± 0.01           | ND                    |

^ND (not detected)

**Supplementary Table S2:** NMR spectroscopic data of purified compounds

| Compound (Mol. Wt.)                 | Purity (%) | <sup>1</sup> H NMR                                                                                                                                                                                                                            | <sup>13</sup> C NMR                                                                                                                                                                            |
|-------------------------------------|------------|-----------------------------------------------------------------------------------------------------------------------------------------------------------------------------------------------------------------------------------------------|------------------------------------------------------------------------------------------------------------------------------------------------------------------------------------------------|
| Eugenol<br>(164 g/mol)              | 99.9       | (200 MHz, CDCl <sub>3</sub> ); δ(ppm): 3.30–3.33(d, 2H, H-7), 3.87 (s, 3H, H-10), 5.03 (br s, 1H, H-9), 5.08 -5.12 (m, 1H, H-9), 5.5 (br s, 1H, 1-OH), 5.85-6.05 (m, 1H, H-8), 6.69 (m, 2H, H-3, 5), 6.83-6.87 (m, 1H, H-6).                  | (50 MHz, CDCl <sub>3</sub> ); δ(ppm): 39.86 (C-7), 52.82 (C-10), 111.05 (C-3), 114.20 (C-6), 115.49 (C-9), 121.14 (C-5), 131.89 (C-4), 137.79 (C-8), 143.86 (C-1), 146.39 (C-2)                |
| Eugenol Methyl Ether<br>(178 g/mol) | 98.2       | (200 MHz, CDCl <sub>3</sub> ); δ(ppm): 3.85 (s, 3H, H-10), 3.86 (s, 3H, H-11), 3.31-3.34 (d, 2H, H-7), 5.03 (br s, 1H, H-9), 5.08 (m, 1H, H-9), 5.85-6.05 (m, 1H, H-8), 6.70 (br s, 1H, H-3), 6.73-6.74 (m, 1H, H-5), 6.78-6.82 (m, 1H, H-6). | (50 MHz, CDCl <sub>3</sub> ); δ(ppm): 39.77 (C-7), 55.75 (C-10), 55.89 (C-11), 111.18 (C-3), 111.79 (C-6), 115.57 (C-9), 120.35 (C-5), 132.59 (C-4), 137.66 (C-8), 147.32 (C-1), 148.84 (C-2). |
| Camphor<br>(152 g/mol)              | 98         | (200 MHz, CDCl <sub>3</sub> ); δ(ppm): 2.29-2.42 (m, 1H, H-3), 0.84 (s, 3H, H-8), 0.91 (s, 3H, H-9), 0.96 (s, 3H, H-10), 1.25-1.47 (m, 2H, H-4), 1.65-1.80 (m, 2H, H-5), 1.89-2.09 (m, 2H, H-2).                                              | (50 MHz, CDCl <sub>3</sub> ); δ(ppm): 9.22 (C-10), 19.12 (C-8), 19.76 (C-9), 27.02 (C-4), 29.89 (C-5), 43.02 (C-3), 43.28 (C-2), 46.77 (C-7), 57.69 (C-6), 200.98 (C-1).                       |

**Supplementary Table S3:** Average precursor ion intensity and other information of AGE modified and corresponding unmodified peptides in *in vivo* plasma samples.

| Sl | Mod Site | Peptide Start-end | Peptide sequence     | Peptide m/z Da | Peptide MH+ Da | PCS | Avg. XCorr | STZ-control (APII) | Vehicle control (APII) | Eug (APII) |
|----|----------|-------------------|----------------------|----------------|----------------|-----|------------|--------------------|------------------------|------------|
| 1  | 588      | 585-602           | AADK*DTC*FSTEGPNLVTR | 715.3          | 2143.97        | +3  | 4.44       | 2.29e4             | 1.60e4                 | 2.24e4     |
| 2  | UM       | 585-602           | AADKDTCFSTEGPNLVTR   | 661.3          | 1981.92        | +3  | 6.39       | 2.44e4             | 5.81e5                 | 4.41e5     |
| 3  | 168      | 153-168           | ENPTTFMGHYLHEVAR*    | 688.6          | 2063.95        | +3  | 2.10       | 2.06e4             | 2.20e4                 | 7.88e3     |
| 4  | UM       | 153-168           | ENPTTFMGHYLHEVAR     | 634.6          | 1901.90        | +3  | 5.16       | 2.16e4             | 3.10e5                 | 9.20e4     |
| 5  | 549      | 549-558           | K*QTALAEVK           | 421.5          | 1262.71        | +3  | 3.71       | 1.20e5             | 8.41e4                 | 5.78e4     |
| 6  | UM       | 549-558           | KQTALAEVK            | 367.5          | 1100.66        | +3  | 4.72       | 3.51e5             | 7.05e5                 | 7.78e5     |
| 7  | 452      | 439-452           | APQVSTPTLVEAAR*      | 801.4          | 1601.83        | +2  | 1.03       | 1.49e4             | 8.56e4                 | 8.92e4     |
| 8  | UM       | 439-452           | APQVSTPTLVEAAR       | 720.4          | 1439.79        | +2  | 4.46       | 1.5e4              | 9.64e4                 | 1.50e5     |

^ UM, Unmodified; \* Indicates modified amino acid side chain; PCS, Peptide Charge State; APII, Average Precursor Ion Intensity.

**Supplementary Table S4:** Extent of AGE modification on peptides *in vitro*. Values in the table represent the average cumulative intensity ratio (CIR) of AGE modified peptides to their unmodified form

| Sample/Site      | K36             | K88            | K160           | K184           | K263           | K438             | K490           | K548            |
|------------------|-----------------|----------------|----------------|----------------|----------------|------------------|----------------|-----------------|
| BSA              | 0<br>(± 0.0)    | 0<br>(± 0.0)   | 0<br>(± 0.0)   | 0<br>(± 0.0)   | 0<br>(± 0.0)   | 0<br>(± 0.0)     | 0<br>(± 0.0)   | 0<br>(± 0.0)    |
| glycated BSA     | 11.91 (± 02.56) | 14.52 (±02.32) | 47.09 (±10.78) | 16.36 (±04.40) | 12.70 (±01.61) | 184.28 (± 46.10) | 09.44 (±02.47) | 199.82 (±47.55) |
| glycated BSA+AMG | 04.91 (± 00.83) | 06.93 (±00.52) | 16.46 (±03.63) | 06.07 (±01.08) | 05.46 (±00.56) | 68.79 (± 14.04)  | 03.47 (±00.43) | 30.61 (±03.44)  |
| glycated BSA+EUG | 02.03 (± 00.11) | 03.43 (±00.69) | 05.90 (±00.96) | 04.08 (±00.23) | 06.19 (±01.32) | 24.66 (± 06.62)  | 05.47 (±01.08) | 36.52 (±03.20)  |

^ Bovine Serum Albumin, BSA; Aminoguanidine hydrochloride, AMG; Eugenol, EUG; lysine, K; Arginine, R.
